# Supplementary material for: Gluten Polymer Networks—A Microstructural Classification in Complex Systems
Source: PubMed Central journal article supplement (PMC6403851; doi:10.3390/polym10060617), 2018-06-05
Supplement: polymers-10-00617-s001.pdf [file polymers-10-00617-s001.pdf]

## Supplementary data

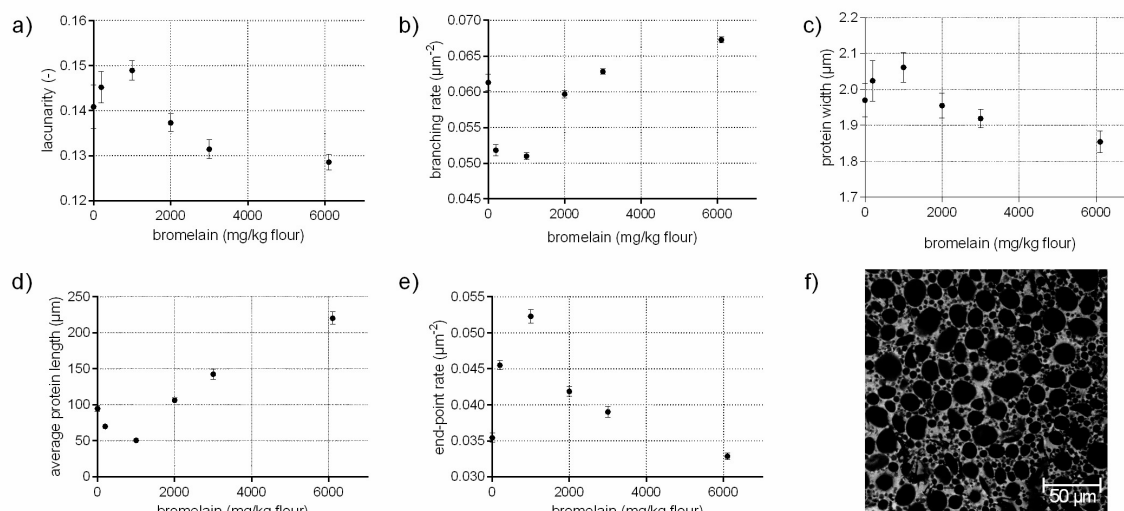

**Figure S1.** Influence of bromelain on the protein network attributes. Flour-water-systems with increasing concentrations of bromelain were analysed by CLSM followed by PNA; a) lacunarity, b) branching rate, c) protein width, d) average protein length, e) end-point rate and f) CLSM image of an entirely destroyed protein polymer structure by proteolysis (scale 215x215  $\mu\text{m}$ , BRN 6100 mg/kg flour). Means are shown with standard error (n=24).

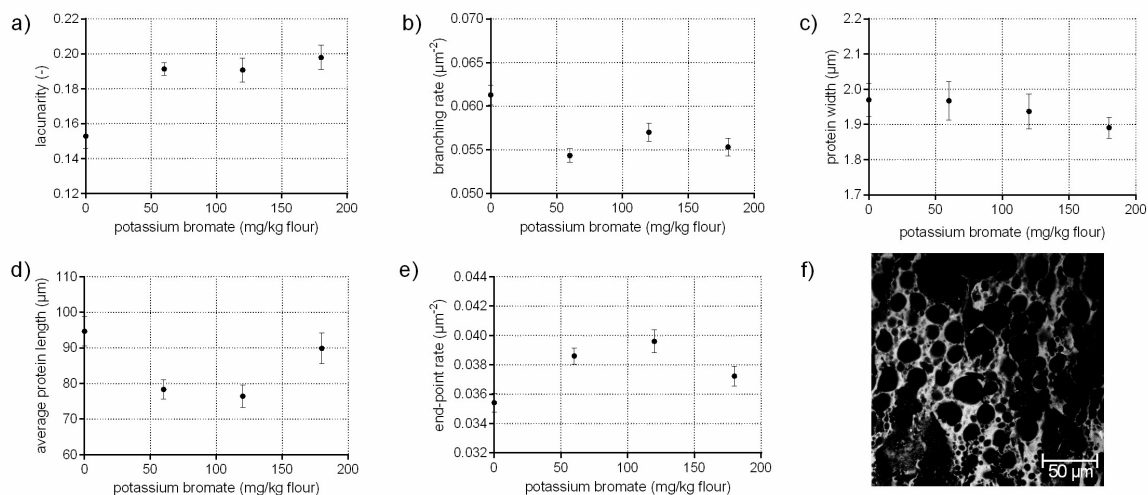

**Figure S2.** Influence of potassium bromate on the protein network attributes. Flour-water-systems with increasing concentrations of potassium bromate were analysed by CLSM followed by PNA; a) lacunarity, b) branching rate, c) protein width, d) average protein length, e) end-point rate and f) CLSM image (scale 215x215  $\mu\text{m}$ , KBrO<sub>3</sub> 120 mg/kg flour). Means are shown with standard error (n=24).

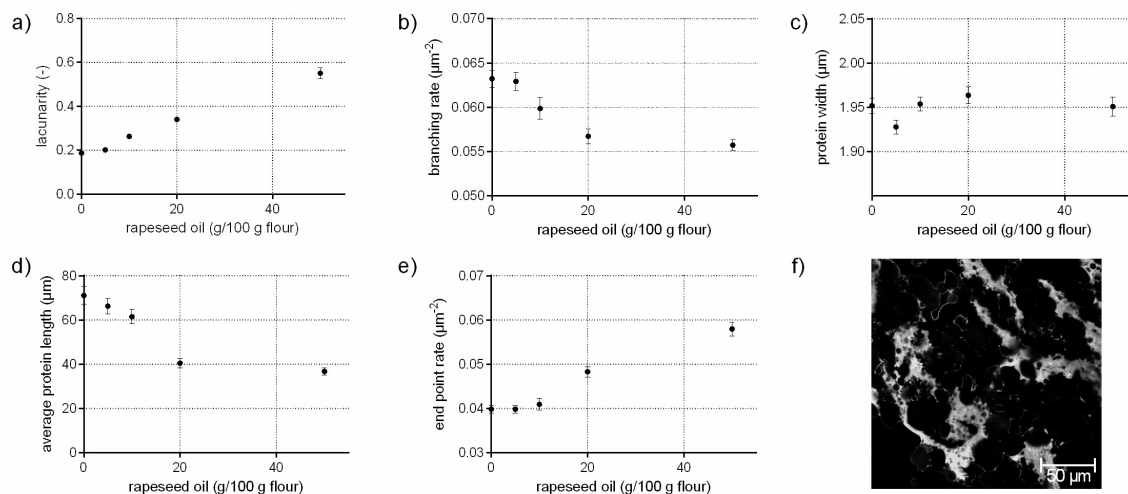

**Figure S3.** Influence of rapeseed oil on the protein network attributes. Flour-water-systems with increasing concentrations of rapeseed oil were analysed by CLSM followed by PNA; a) lacunarity, b) branching rate, c) protein width, d) average protein length, e) end-point rate and f) CLSM image (scale 215x215  $\mu\text{m}$ , ROI 50 g/100 g flour). Means are shown with standard error (n=24).

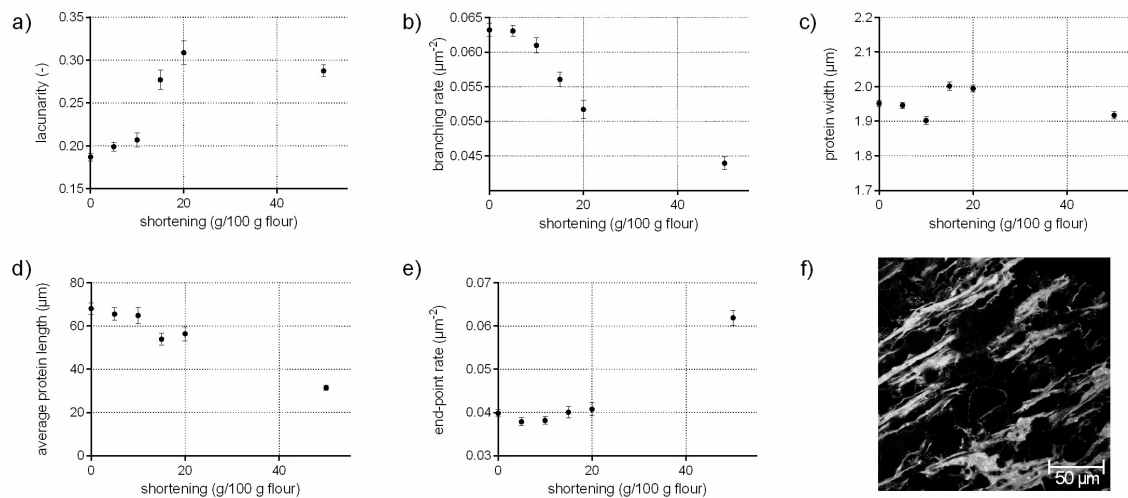

**Figure S4.** Influence of shortening on the protein network attributes. Flour-water-systems with increasing concentrations of shortening were analysed by CLSM followed by PNA; a) lacunarity, b) branching rate, c) protein width, d) average protein length, e) end-point rate and f) CLSM image (scale 215x215  $\mu\text{m}$ , SHO 50 g/100 g flour). Means are shown with standard error (n=24).

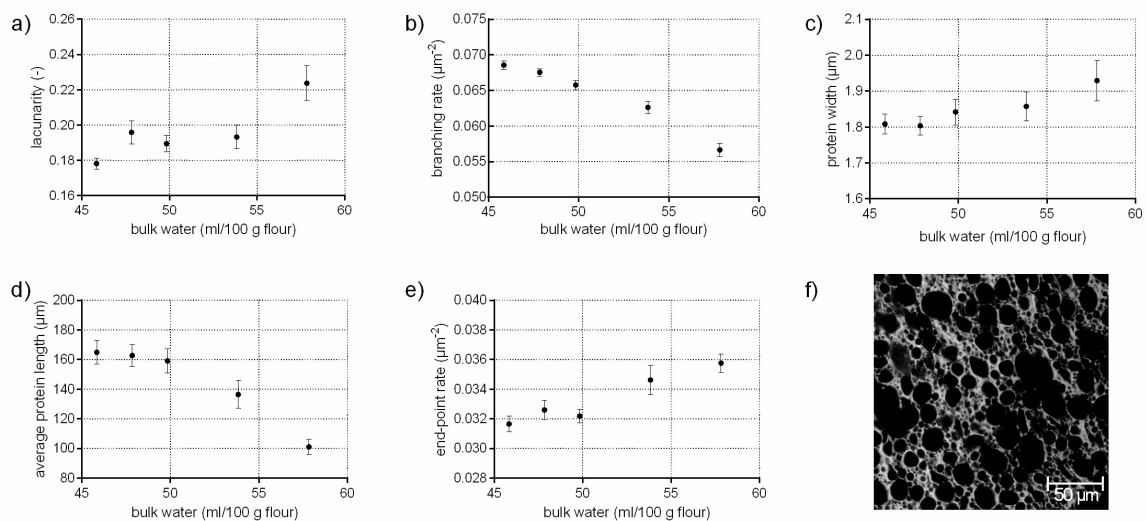

**Figure S5.** Influence of a reduced hydration level on the protein network attributes. Flour-water-systems with decreasing water hydration levels were analysed by CLSM followed by PNA; a) lacunarity, b) branching rate, c) protein width, d) average protein length, e) end-point rate and f) CLSM image (scale 215x215  $\mu\text{m}$ , RHL 45.85 ml/100 g flour). Means are shown with standard error (n=24).
